# Supplementary material for: Insitu ultrasound-assisted synthesis of Fe3O4 nanoparticles with simultaneous ion co-precipitation for multielemental analysis of natural waters by total reflection X-ray fluorescence spectrometry
Source: Royal Society of Chemistry journal article supplement (doi:10.1039/c3ja50067e), 2013-01-01
Supplement: c3ja50067e.pdf [file c3ja50067e.pdf]

## Electronic Supplementary Information (ESI)

### ***In situ* ultrasound-assisted synthesis of Fe<sub>3</sub>O<sub>4</sub> nanoparticles with simultaneous ion co-precipitation for multielemental analysis of natural waters by total reflection X-ray fluorescence spectrometry**

**Vanesa Romero, Isabel Costas-Mora, Isela Lavilla and Carlos Bendicho\***

*Departamento de Química Analítica y Alimentaria, Área de Química Analítica;  
Facultad de Química, Universidad de Vigo, Campus As Lagoas-Marcosende s/n, 36310  
Vigo, Spain. E-mail: [bendicho@uvigo.es](mailto:bendicho@uvigo.es); Fax: +34-986-812556; Tel: +34-986-812281*

#### **Contents**

The ESI contains three additional Tables:

**Table S1.** Adjustment of experimental data to Berthelot-Nernst law and Doerner-Hoskins law

**Table S2.** Study of possible interferents in natural waters on the application of the *in situ* UAMS-SIC approach combined with TXRF for multielemental analysis

**Table S3.** Values of the ion metal contents and recoveries obtained by applying the *in situ* UAMS-SIC approach combined with TXRF for different natural water matrices

**Table S1. Adjustment of experimental data to Berthelot-Nernst law and Doerner-Hoskins law**

| Analyte | Berthelot-Nernst law            |                         | Doerner-Hoskins law             |                         |
|---------|---------------------------------|-------------------------|---------------------------------|-------------------------|
|         | Equation for linear calibration | Correlation coefficient | Equation for linear calibration | Correlation Coefficient |
| Cu      | $y = 0.5991 x - 2E-05$          | 0.9312                  | $y = 0.5833 x + 0.0135$         | 0.9232                  |
| Zn      | $y = 2.4713 x - 0.0002$         | 0.9975                  | $y = 0.6876 x - 0.0138$         | 0.9912                  |
| Ge      | $y = 35.12 x + 0.0001$          | 0.9907                  | $y = 0.7769 x - 0.0106$         | 0.9824                  |
| As      | $y = 2.6019 x + 3E-05$          | 0.9913                  | $y = 1.058 x - 0.0938$          | 0.9863                  |
| Se      | $y = 1.709 x - 0.0001$          | 0.8326                  | $y = 0.7255 x - 0.0271$         | 0.9568                  |
| Re      | $y = 0.9968 x - 3E-07$          | 0.9917                  | $y = 1.3417 x + 0.0960$         | 0.9574                  |
| Au      | $y = 1.7626 x - 0.0002$         | 0.9685                  | $y = 0.9315 x - 0.0652$         | 0.9516                  |
| Hg      | $y = 5.3764 x + 2E-05$          | 0.9987                  | $y = 1.1054 x - 0.0719$         | 0.9593                  |
| Tl      | $y = 1.0004 x + 3E-05$          | 0.9817                  | $y = 0.7973 x - 0.0962$         | 0.9061                  |
| Bi      | $y = 1.1245 x + 3E-05$          | 0.9927                  | $y = 0.9885 x - 0.0384$         | 0.9696                  |
| Pb      | $y = 1.0862 x + 9E-05$          | 0.9957                  | $y = 1.1673 x - 0.0774$         | 0.9820                  |

**Table S2. Study of possible interferences in natural waters on the application of the *in situ* UAMS-SIC approach combined with TXRF for multielemental analysis**

| <b>Interferent</b>                  | <b>Studied level (mg L<sup>-1</sup>)</b> | <b>Recoveries (%)</b>                    |
|-------------------------------------|------------------------------------------|------------------------------------------|
| <b>NaCl</b>                         | <b>100</b>                               | <b>95-104 (except Se, recovery: 65)</b>  |
|                                     | <b>1000</b>                              | <b>100-107 (except Se, recovery: 68)</b> |
|                                     | <b>20000</b>                             | <b>96-107 (except Se, recovery: 62)</b>  |
|                                     | <b>50000</b>                             | <b>68-76 (except Se, recovery: 34)</b>   |
| <b>Na<sub>2</sub>SO<sub>4</sub></b> | <b>100</b>                               | <b>101-103 (except Se, recovery: 63)</b> |
|                                     | <b>1000</b>                              | <b>100-105 (except Se, recovery: 66)</b> |
|                                     | <b>20000</b>                             | <b>102-106 (except Se, recovery: 64)</b> |
|                                     | <b>50000</b>                             | <b>64-71 (except Se, recovery: 42)</b>   |
| <b>MgCl<sub>2</sub></b>             | <b>5</b>                                 | <b>98-108 (except Se, recovery: 68)</b>  |
|                                     | <b>20</b>                                | <b>101-107 (except Se, recovery: 63)</b> |
|                                     | <b>100</b>                               | <b>99-107 (except Se, recovery: 61)</b>  |
|                                     | <b>200</b>                               | <b>51-64 (except Se, recovery: 48)</b>   |
| <b>KH<sub>2</sub>PO<sub>4</sub></b> | <b>5</b>                                 | <b>99-108 (except Se, recovery: 65)</b>  |
|                                     | <b>20</b>                                | <b>100-105 (except Se, recovery: 64)</b> |
|                                     | <b>100</b>                               | <b>101-108 (except Se, recovery: 64)</b> |
|                                     | <b>200</b>                               | <b>99-105 (except Se, recovery: 68)</b>  |
| <b>CaSO<sub>4</sub></b>             | <b>50</b>                                | <b>99-107 (except Se, recovery: 63)</b>  |
|                                     | <b>100</b>                               | <b>100-108 (except Se, recovery: 64)</b> |
|                                     | <b>500</b>                               | <b>100-106 (except Se, recovery: 65)</b> |
|                                     | <b>2000</b>                              | <b>100-107 (except Se, recovery: 64)</b> |
| <b>Na<sub>2</sub>CO<sub>3</sub></b> | <b>50</b>                                | <b>100-103 (except Se, recovery: 64)</b> |
|                                     | <b>100</b>                               | <b>97-105 (except Se, recovery: 66)</b>  |
|                                     | <b>500</b>                               | <b>101-107 (except Se, recovery: 67)</b> |
|                                     | <b>5000</b>                              | <b>72-61 (except Se, recovery: 39)</b>   |
| <b>KNO<sub>3</sub></b>              | <b>200</b>                               | <b>95-104 (except Se, recovery: 63)</b>  |
|                                     | <b>5000</b>                              | <b>100-104 (except Se, recovery: 65)</b> |
|                                     | <b>12000</b>                             | <b>100-104 (except Se, recovery: 68)</b> |
| <b>Humic acid</b>                   | <b>1</b>                                 | <b>99-108 (except Se, recovery: 64)</b>  |
|                                     | <b>10</b>                                | <b>99-106 (except Se, recovery: 63)</b>  |
|                                     | <b>20*</b>                               | <b>---</b>                               |

\*For concentrations of humic acid higher than 10 mg L<sup>-1</sup>, *in situ* UAMS-SIC can not be performed because Fe<sub>3</sub>O<sub>4</sub> NPs are stabilized by the humic acid.

**Table S3. Found values and recoveries obtained by applying the *in situ* UAMS-SIC approach combined with TXRF for different natural water matrices**

| Sample         | Metal added ( $\mu\text{g L}^{-1}$ ) | Metal found ( $\mu\text{g L}^{-1}$ ) $\pm$ standard deviation, N=3<br>(Recovery (%) $\pm$ standard deviation, N=3) |                                  |                                  |                                  |                                |                                  |                                 |                                  |                                  |                                  |                                  |
|----------------|--------------------------------------|--------------------------------------------------------------------------------------------------------------------|----------------------------------|----------------------------------|----------------------------------|--------------------------------|----------------------------------|---------------------------------|----------------------------------|----------------------------------|----------------------------------|----------------------------------|
|                |                                      | Cu                                                                                                                 | Ge                               | Zn                               | As                               | Se                             | Au                               | Hg                              | Tl                               | Pb                               | Bi                               | Re                               |
| Drinking water | 0                                    | 0.8 $\pm$ 0.1                                                                                                      | < LLD                            | 1.5 $\pm$ 0.1                    | < LLD                            | < LLD                          | < LLD                            | < LLD                           | 1.8 $\pm$ 0.1                    | < LLD                            | < LLD                            | < LLD                            |
|                | 10                                   | 9 $\pm$ 0.1<br>(89 $\pm$ 1)                                                                                        | 10 $\pm$ 0.2<br>(103 $\pm$ 2)    | 10 $\pm$ 0.2<br>(100 $\pm$ 2)    | 10 $\pm$ 0.1<br>(99 $\pm$ 1)     | < LLD                          | 11 $\pm$ 0.1<br>(109 $\pm$ 1)    | 11 $\pm$ 0.1<br>(107 $\pm$ 1)   | 10 $\pm$ 0.2<br>(102 $\pm$ 3)    | 10 $\pm$ 0.1<br>(101 $\pm$ 1)    | 11 $\pm$ 0.2<br>(114 $\pm$ 3)    | < LLD                            |
|                | 50                                   | 50 $\pm$ 0.2<br>(100 $\pm$ 1)                                                                                      | 51 $\pm$ 1<br>(101 $\pm$ 0.3)    | 50 $\pm$ 0.4<br>(101 $\pm$ 1)    | 50 $\pm$ 1<br>(101 $\pm$ 1)      | 31 $\pm$ 1<br>(63 $\pm$ 1)     | 52 $\pm$ 1<br>(105 $\pm$ 2)      | 48 $\pm$ 1<br>(96 $\pm$ 1)      | 49 $\pm$ 1<br>(98 $\pm$ 1)       | 49 $\pm$ 1<br>(99 $\pm$ 2)       | 50 $\pm$ 0.5<br>(100 $\pm$ 1)    | 51 $\pm$ 1<br>(102 $\pm$ 1)      |
|                | 300                                  | 299 $\pm$ 1<br>(100 $\pm$ 1)                                                                                       | 289 $\pm$ 1<br>(96 $\pm$ 1)      | 302 $\pm$ 1<br>(101 $\pm$ 1)     | 292 $\pm$ 2<br>(97 $\pm$ 1)      | 194 $\pm$ 2<br>(65 $\pm$ 1)    | 303 $\pm$ 2<br>(101 $\pm$ 3)     | 285 $\pm$ 1<br>(95 $\pm$ 1)     | 302 $\pm$ 1<br>(100 $\pm$ 1)     | 300 $\pm$ 1<br>(100 $\pm$ 1)     | 295 $\pm$ 2<br>(98 $\pm$ 1)      | 302 $\pm$ 2<br>(103 $\pm$ 1)     |
| Tap water      | 0                                    | 2.5 $\pm$ 0.6                                                                                                      | < LLD                            | 3.2 $\pm$ 0.5                    | < LLD                            | < LLD                          | < LLD                            | < LLD                           | < LLD                            | < LLD                            | < LLD                            | < LLD                            |
|                | 10                                   | 12 $\pm$ 1<br>(95 $\pm$ 2)                                                                                         | 10 $\pm$ 0.1<br>(104 $\pm$ 1)    | 10 $\pm$ 0.1<br>(100 $\pm$ 1)    | 10 $\pm$ 0.1<br>(101 $\pm$ 1)    | < LLD                          | 10 $\pm$ 0.2<br>(97 $\pm$ 3)     | 11 $\pm$ 0.1<br>(107 $\pm$ 2)   | 10 $\pm$ 0.1<br>(101 $\pm$ 1)    | 10 $\pm$ 1<br>(97 $\pm$ 1)       | 10 $\pm$ 0.2<br>(98 $\pm$ 2)     | < LLD                            |
|                | 50                                   | 49 $\pm$ 1<br>(98 $\pm$ 2)                                                                                         | 51 $\pm$ 1<br>(102 $\pm$ 1)      | 50 $\pm$ 0.1<br>(100 $\pm$ 0.1)  | 49 $\pm$ 0.5<br>(98 $\pm$ 1)     | 27 $\pm$ 1<br>(54 $\pm$ 1)     | 51 $\pm$ 0.4<br>(102 $\pm$ 1)    | 48 $\pm$ 1<br>(96 $\pm$ 2)      | 50 $\pm$ 0.1<br>(99 $\pm$ 0.2)   | 51 $\pm$ 1<br>(102 $\pm$ 1)      | 47 $\pm$ 0.2<br>(94 $\pm$ 0.5)   | 48 $\pm$ 1<br>(97 $\pm$ 1)       |
|                | 300                                  | 310 $\pm$ 1<br>(103 $\pm$ 1)                                                                                       | 296 $\pm$ 1<br>(99 $\pm$ 2)      | 306 $\pm$ 1<br>(102 $\pm$ 1)     | 303 $\pm$ 2<br>(101 $\pm$ 1)     | 196 $\pm$ 1<br>(65 $\pm$ 1)    | 296 $\pm$ 1<br>(99 $\pm$ 0.4)    | 300 $\pm$ 1<br>(101 $\pm$ 1)    | 295 $\pm$ 1<br>(98 $\pm$ 1)      | 302 $\pm$ 1<br>(101 $\pm$ 1)     | 303 $\pm$ 0.1<br>(101 $\pm$ 0.2) | 300 $\pm$ 1<br>(100 $\pm$ 1.0)   |
| Mineral water  | 0                                    | 0.7 $\pm$ 0.1                                                                                                      | < LLD                            | 13 $\pm$ 1                       | < LLD                            | < LLD                          | < LLD                            | < LLD                           | < LLD                            | < LLD                            | < LLD                            | < LLD                            |
|                | 10                                   | 10 $\pm$ 0.1<br>(100 $\pm$ 2)                                                                                      | 10 $\pm$ 0.1<br>(101 $\pm$ 1)    | 10 $\pm$ 0.3<br>(100 $\pm$ 3)    | 10 $\pm$ 0.2<br>(100 $\pm$ 2)    | < LLD                          | 10 $\pm$ 0.1<br>(100 $\pm$ 1)    | 10 $\pm$ 0.1<br>(101 $\pm$ 1)   | 10 $\pm$ 0.2<br>(102 $\pm$ 2)    | 10 $\pm$ 0.1<br>(101 $\pm$ 1)    | 10 $\pm$ 0.2<br>(103 $\pm$ 1)    | < LLD                            |
|                | 50                                   | 50 $\pm$ 0.3<br>(101 $\pm$ 1)                                                                                      | 50 $\pm$ 0.3<br>(100 $\pm$ 1)    | 51 $\pm$ 1<br>(102 $\pm$ 0.1)    | 50 $\pm$ 0.1<br>(100 $\pm$ 0.3)  | 30 $\pm$ 0.4<br>(60 $\pm$ 1)   | 50 $\pm$ 0.1<br>(100 $\pm$ 0.3)  | 50 $\pm$ 0.5<br>(100 $\pm$ 0.1) | 50 $\pm$ 0.2<br>(100 $\pm$ 0.4)  | 50 $\pm$ 0.4<br>(101 $\pm$ 0.1)  | 50 $\pm$ 0.4<br>(101 $\pm$ 0.1)  | 50 $\pm$ 0.4<br>(101 $\pm$ 1)    |
|                | 300                                  | 300 $\pm$ 0.4<br>(100 $\pm$ 0.1)                                                                                   | 300 $\pm$ 0.5<br>(100 $\pm$ 0.2) | 300 $\pm$ 0.5<br>(100 $\pm$ 1)   | 301 $\pm$ 1<br>(100 $\pm$ 0.2)   | 191 $\pm$ 0.3<br>(64 $\pm$ 1)  | 301 $\pm$ 1<br>(100 $\pm$ 0.2)   | 300 $\pm$ 1<br>(100 $\pm$ 0.3)  | 300 $\pm$ 0.1<br>(100 $\pm$ 0.4) | 301 $\pm$ 0.2<br>(100 $\pm$ 0.1) | 301 $\pm$ 0.2<br>(100 $\pm$ 0.1) | 300 $\pm$ 0.2<br>(100 $\pm$ 0.1) |
| River water    | 0                                    | 0.30 $\pm$ 0.01                                                                                                    | < LLD                            | 2.8 $\pm$ 0.5                    | < LLD                            | < LLD                          | < LLD                            | < LLD                           | < LLD                            | < LLD                            | < LLD                            | < LLD                            |
|                | 10                                   | 10 $\pm$ 0.1<br>(100 $\pm$ 1)                                                                                      | 10 $\pm$ 0.1<br>(105 $\pm$ 1)    | 10 $\pm$ 1.0<br>(100 $\pm$ 1)    | 10 $\pm$ 0.2<br>(97 $\pm$ 2)     | < LLD                          | 10 $\pm$ 0.2<br>(99 $\pm$ 2)     | 10 $\pm$ 0.1<br>(101 $\pm$ 1)   | 10 $\pm$ 0.2<br>(105 $\pm$ 3)    | 10 $\pm$ 0.1<br>(100 $\pm$ 1)    | 10 $\pm$ 0.1<br>(104 $\pm$ 1)    | < LLD                            |
|                | 50                                   | 50 $\pm$ 0.2<br>(100 $\pm$ 1)                                                                                      | 50 $\pm$ 1<br>(100 $\pm$ 2)      | 49 $\pm$ 1<br>(99 $\pm$ 0.4)     | 50 $\pm$ 0.2<br>(101 $\pm$ 0.5)  | 34 $\pm$ 0.2<br>(68 $\pm$ 0.1) | 50 $\pm$ 1<br>(100 $\pm$ 0.5)    | 49 $\pm$ 0.1<br>(98 $\pm$ 0.3)  | 50 $\pm$ 1<br>(101 $\pm$ 0.5)    | 51 $\pm$ 0.5<br>(101 $\pm$ 1)    | 50 $\pm$ 0.5<br>(101 $\pm$ 1)    | 50 $\pm$ 0.4<br>(100 $\pm$ 1)    |
|                | 300                                  | 301 $\pm$ 0.2<br>(100 $\pm$ 1)                                                                                     | 301 $\pm$ 1<br>(101 $\pm$ 1)     | 300 $\pm$ 0.5<br>(100 $\pm$ 1)   | 300 $\pm$ 0.3<br>(100 $\pm$ 0.1) | 192 $\pm$ 1<br>(64 $\pm$ 1)    | 300 $\pm$ 1<br>(100 $\pm$ 1)     | 300 $\pm$ 1<br>(100 $\pm$ 1)    | 300 $\pm$ 1<br>(100 $\pm$ 0.3)   | 300 $\pm$ 1<br>(100 $\pm$ 0.4)   | 301 $\pm$ 1<br>(100 $\pm$ 1)     | 300 $\pm$ 0.2<br>(100 $\pm$ 1)   |
| Dam water      | 0                                    | 0.30 $\pm$ 0.01                                                                                                    | < LLD                            | 0.6 $\pm$ 0.1                    | < LLD                            | < LLD                          | < LLD                            | < LLD                           | < LLD                            | < LLD                            | < LLD                            | < LLD                            |
|                | 10                                   | 10 $\pm$ 0.2<br>(101 $\pm$ 2)                                                                                      | 10 $\pm$ 0.1<br>(105 $\pm$ 1)    | 10 $\pm$ 0.1<br>(104 $\pm$ 1)    | 10 $\pm$ 0.1<br>(100 $\pm$ 1)    | < LLD                          | 10 $\pm$ 0.2<br>(102 $\pm$ 2)    | 10 $\pm$ 0.2<br>(102 $\pm$ 2)   | 10 $\pm$ 0.1<br>(101 $\pm$ 2)    | 10 $\pm$ 0.2<br>(105 $\pm$ 3)    | 10 $\pm$ 0.1<br>(100 $\pm$ 1)    | < LLD                            |
|                | 50                                   | 50 $\pm$ 0.1<br>(100 $\pm$ 0.1)                                                                                    | 50 $\pm$ 0.1<br>(101 $\pm$ 0.2)  | 50 $\pm$ 0.1<br>(101 $\pm$ 0.1)  | 50 $\pm$ 0.3<br>(101 $\pm$ 1)    | 38 $\pm$ 0.3<br>(76 $\pm$ 1)   | 50 $\pm$ 0.1<br>(100 $\pm$ 0.3)  | 50 $\pm$ 0.1<br>(100 $\pm$ 0.3) | 50 $\pm$ 0.2<br>(100 $\pm$ 0.4)  | 50 $\pm$ 1<br>(101 $\pm$ 0.1)    | 50 $\pm$ 0.2<br>(100 $\pm$ 0.5)  | 50 $\pm$ 0.2<br>(100 $\pm$ 0.4)  |
|                | 300                                  | 301 $\pm$ 0.5<br>(100 $\pm$ 0.2)                                                                                   | 300 $\pm$ 0.4<br>(100 $\pm$ 0.1) | 300 $\pm$ 1<br>(100 $\pm$ 0.3)   | 300 $\pm$ 0.2<br>(100 $\pm$ 0.1) | 191 $\pm$ 1<br>(64 $\pm$ 1)    | 300 $\pm$ 0.5<br>(100 $\pm$ 0.1) | 300 $\pm$ 0.1<br>(100 $\pm$ 1)  | 300 $\pm$ 0.3<br>(100 $\pm$ 0.1) | 301 $\pm$ 0.2<br>(100 $\pm$ 1)   | 300 $\pm$ 0.5<br>(100 $\pm$ 0.2) | 300 $\pm$ 0.1<br>(100 $\pm$ 0.2) |
| Well water     | 0                                    | < LLD                                                                                                              | < LLD                            | 3.3 $\pm$ 0.2                    | < LLD                            | < LLD                          | < LLD                            | < LLD                           | < LLD                            | < LLD                            | < LLD                            | < LLD                            |
|                | 10                                   | 11 $\pm$ 1<br>(109 $\pm$ 1)                                                                                        | 10 $\pm$ 0.1<br>(103 $\pm$ 1)    | 10 $\pm$ 0.1<br>(99 $\pm$ 1)     | 10 $\pm$ 0.2<br>(104 $\pm$ 2)    | < LLD                          | 10 $\pm$ 1<br>(108 $\pm$ 1)      | 9 $\pm$ 0.1<br>(94 $\pm$ 1)     | 10 $\pm$ 0.1<br>(97 $\pm$ 2)     | 10 $\pm$ 0.1<br>(98 $\pm$ 1)     | 11 $\pm$ 0.2<br>(106 $\pm$ 3)    | < LLD                            |
|                | 50                                   | 51 $\pm$ 0.2<br>(101 $\pm$ 0.4)                                                                                    | 50 $\pm$ 1<br>(100 $\pm$ 1)      | 51 $\pm$ 0.2<br>(102 $\pm$ 0.4)  | 50 $\pm$ 1<br>(101 $\pm$ 1)      | 39 $\pm$ 0.1<br>(78 $\pm$ 1)   | 51 $\pm$ 0.5<br>(102 $\pm$ 2)    | 50 $\pm$ 1<br>(101 $\pm$ 0.3)   | 49 $\pm$ 1<br>(98 $\pm$ 1)       | 51 $\pm$ 1<br>(102 $\pm$ 1)      | 49 $\pm$ 0.4<br>(98 $\pm$ 1)     | 50 $\pm$ 0.3<br>(101 $\pm$ 1)    |
|                | 300                                  | 301 $\pm$ 0.3<br>(100 $\pm$ 1)                                                                                     | 303 $\pm$ 1<br>(101 $\pm$ 3)     | 302 $\pm$ 0.1<br>(101 $\pm$ 0.5) | 296 $\pm$ 1<br>(98 $\pm$ 0.4)    | 193 $\pm$ 1<br>(64 $\pm$ 0.3)  | 300 $\pm$ 0.4<br>(100 $\pm$ 0.1) | 302 $\pm$ 1<br>(101 $\pm$ 0.3)  | 298 $\pm$ 0.4<br>(99 $\pm$ 0.5)  | 300 $\pm$ 0.4<br>(100 $\pm$ 1)   | 300 $\pm$ 0.5<br>(100 $\pm$ 1)   | 301 $\pm$ 0.4<br>(100 $\pm$ 1)   |

LLD: Lowest detection limit
